# Supplementary material
Source: publisher site journal article supplement (https://www.dovepress.com/article/supplementary_file/573333/573333%20Revised%20supplementary_2.docx)
Supplement: Supplementary file 1 [file 573333%20Revised%20supplementary_2.docx]

**Supplemental File 1: Search Strategy**

**Pubmed: 268**

**Embase: 349**

**Web of Science: 289**

**Cochrane Central Register of Controlled Trials: 61**

**967 total, 736 when duplicates removed. (127 added Feb 2026)**

**Pubmed:**

((spinal cord injury OR "quadriplegia"[MeSH Terms] OR "quadriplegia" OR "tetraplegia" OR "tetraplegias" OR "paraplegia"[MeSH Terms] OR "paraplegia" OR "paraplegias" OR "spinal cord transection" OR "myelopathy" OR "myelopathies")

AND ("spinal cord stimulation"[MeSH Terms] OR "spinal cord stimulation" OR "spinal cord stimulator" OR "epidural stimulation" OR "epidural stimulator" OR "paddle spinal cord stimulation" OR "paddle spinal cord stimulator" OR "transcutaneous spinal cord stimulation" OR "transcutaneous electric nerve stimulation"[MeSH Terms] OR "transcutaneous electric nerve stimulation" OR "transcutaneous electrical stimulation" OR "implantable electrodes" OR "electrodes, implanted"[MeSH Terms] OR "implanted electrodes" OR "neurostimulator" OR "neurostimulators" OR "neurostimulation" OR "neurostimulations" OR "neuromodulation") AND ("pain"[MeSH Terms] OR "pain"))

AND (clinicaltrial[Filter] OR controlledclinicaltrial[Filter] OR pragmaticclinicaltrial[Filter] OR randomizedcontrolledtrial[Filter] OR randomized controlled trial[pt] OR controlled clinical trial[pt] OR randomized[tiab] OR placebo[tiab] OR drug therapy[sh] OR randomly[tiab] OR trial[tiab] OR groups[tiab] OR clinical trials as topic [mesh:noexp]) AND (1000/1/1:2024/4/1[pdat])

**Embase:**

(spinal cord injury.mp. or exp spinal cord injury/ or quadriplegia.mp. or exp quadriplegia/ or tetraplegia.mp. or exp paraplegia/ or paraplegia.mp. or paraplegias.mp. or "spinal cord transection".mp. or exp spinal cord transsection/ or myelopathy.mp. or myelopathies.mp.) and ((neurostimulation or neurostimulator).mp. or exp nerve stimulation/ or electrode implant.mp. or exp electrode implant/ or implanted electrodes.mp. or implantable electrodes.mp. or transcutaneous electric nerve stimulation.mp. or exp transcutaneous electrical nerve stimulation/) and (pain.mp. or exp pain/)

Embase RCT filter for Ovid - 30 April 2023 revision

1 exp randomized controlled trial/

2 controlled clinical trial/

3 random$.ti,ab.

4 randomization/

5 intermethod comparison/

6 placebo.ti,ab.

7 (compare OR compared OR comparison).ti,ab.

8 ((evaluated OR evaluate OR evaluating OR assessed OR assess) AND (compare OR compared OR comparing OR comparison)).ab.

9 (open adj label).ti,ab.

10 ((double OR single OR doubly OR singly) adj (blind OR blinded OR blindly)).ti,ab.

11 double blind procedure/

12 parallel group$1.ti,ab.

13 (crossover OR cross over).ti,ab.

14 ((assign$ OR match OR matched OR allocation) adj5 (alternate OR group$1 OR intervention$1 OR patient$1 OR subject$1 OR participant$1)).ti,ab.

15 (assigned OR allocated).ti,ab.

16 (controlled adj7 (study OR design OR trial)).ti,ab.

17 (volunteer OR volunteers).ti,ab.

18 human experiment/

19 trial.ti.

20 or/1-19

21 (random$ adj sampl$ adj7 ("cross section$" OR questionnaire$1 OR survey$ OR database$1)).ti,ab. NOT (comparative study/ OR controlled study/ OR randomi?ed controlled.ti,ab. OR randomly assigned.ti,ab.)

22 cross-sectional study/ NOT (exp randomized controlled trial/ OR controlled clinical trial/ OR controlled study/ OR randomi?ed controlled.ti,ab. OR control group$1.ti,ab.)

23 (((case adj control$) AND random$) NOT randomi?ed controlled).ti,ab.

24 systematic review.ti,ab. NOT (trial.ti. OR study.ti)

25 (nonrandom$ NOT random$).ti,ab.

26 "random field$".ti,ab.

27 (random cluster adj3 sampl$).ti,ab.

28 (review.ab. AND review.pt.) NOT trial.ti.

29 ("we searched".ab. AND (review.ti. OR review.pt.))

30 "update review".ab.

31 (databases adj4 searched).ab.

32 (rat OR rats OR mouse OR mice OR swine OR porcine OR murine OR sheep OR lambs OR pigs OR piglets OR rabbit OR rabbits OR cat OR cats OR dog OR dogs OR cattle OR bovine OR monkey OR monkeys OR trout OR marmoset$1).ti. AND animal experiment/

33 animal experiment/ NOT (human experiment/ OR human/)

34 or/21-33

35 20 NOT 34

**Web of Science:**

"spinal cord" injury or quadriplegia or tetraplegia or paraplegia or "spinal cord transection" or "myelopathy" OR "myelopathies") (Topic) and "spinal cord" stimulation OR "epidural stimulation" OR "paddle spinal cord stimulation" OR "transcutaneous spinal cord stimulation" OR "transcutaneous electric nerve stimulation" OR "transcutaneous electric nerve stimulation" OR "transcutaneous electrical stimulation" OR "implantable electrodes" OR "electrode implant" OR "implanted electrodes" OR neurostimulator OR neurostimulators OR neurostimulation OR neuromodulation (Topic) and pain (Topic) and Article (Document Types) and English (Languages)

and (TS= clinical trial* OR TS=controlled trial* OR TS=(single blind*) OR TS=(double blind*))

**Cochrane Central Register of Controlled Trials:**

((spinal cord injury or "quadriplegia" or "tetraplegia" or "tetraplegias" or "paraplegia" or "paraplegias" or spinal cord transection or "myelopathy" or "myelopathies") and (spinal cord stimulation or "spinal cord stimulation" or "spinal cord stimulator" or "epidural stimulation" or "epidural stimulator" or "paddle spinal cord stimulation" or "paddle spinal cord stimulator" or "transcutaneous spinal cord stimulation" or "transcutaneous electric nerve stimulation" or "transcutaneous electrical stimulation" or "implantable electrodes" or "electrode implant" or "implanted electrodes" or "neurostimulator" or "neurostimulators" or "neurostimulation" or "neurostimulations" or "neuromodulation") and pain).mp.

**Supplemental File 2: Methodological Standards for Epidemiological Research (MASTER) Quality Assessment**

Note: Table has been transposed (studies as columns, criteria as rows) to facilitate readability. Original orientation had studies as rows.

| **Safeguard (SG)** | **Meglio et al. (1989)** | **Hamid et al. (2007)** | **Tseng et al. (2000)** | **Noordhof et al. (2022)** | **Biktimirov et al. (2023)** | **Lee et al. (2024)** | **Reddy (2019)** | **Rosales et al. (2022)** | **Reck & Landmann (2017)** | **Kim et al. (2010)** |
| --- | --- | --- | --- | --- | --- | --- | --- | --- | --- | --- |
| SG1 | 1 | 1 | 1 | 1 | 1 | 1 | 1 | 1 | 1 | 1 |
| SG2 | 0 | 0 | 0 | 0 | 1 | 0 | 0 | 0 | 0 | 0 |
| SG3 | 0 | 0 | 0 | 0 | 0 | 0 | 0 | 0 | 0 | 0 |
| SG4 | 1 | 0 | 0 | 0 | 1 | 0 | 0 | 0 | 0 | 0 |
| SG5 | 1 | 1 | 0 | 1 | 1 | 1 | 1 | 1 | 1 | 1 |
| SG6 | 1 | 0 | 0 | 0 | 1 | 0 | 0 | 0 | 1 | 1 |
| SG7 | 1 | 0 | 0 | 0 | 1 | 0 | 0 | 0 | 0 | 0 |
| SG8 | 0 | 1 | 0 | 1 | 1 | 1 | 1 | 1 | 1 | 1 |
| SG9 | 0 | 0 | 0 | 0 | 1 | 0 | 0 | 0 | 0 | 0 |
| SG10 | 0 | 1 | 0 | 1 | 1 | 1 | 1 | 1 | 0 | 0 |
| SG11 | 1 | 1 | 0 | 1 | 1 | 0 | 0 | 0 | 0 | 0 |
| SG12 | 0 | 0 | 0 | 0 | 1 | 0 | 0 | 0 | 0 | 0 |
| SG13 | 0 | 0 | 0 | 0 | 0 | 0 | 0 | 0 | 0 | 0 |
| SG14 | 0 | 0 | 0 | 0 | 0 | 0 | 0 | 0 | 0 | 0 |
| SG15 | 0 | 0 | 0 | 0 | 0 | 0 | 0 | 0 | 0 | 0 |
| SG16 | 0 | 0 | 0 | 0 | 0 | 0 | 0 | 0 | 0 | 0 |
| SG17 | 1 | 1 | 1 | 1 | 1 | 1 | 1 | 1 | 1 | 1 |
| SG18 | 0 | 0 | 0 | 0 | 0 | 0 | 0 | 0 | 1 | 1 |
| SG19 | 0 | 0 | 0 | 0 | 0 | 0 | 0 | 0 | 0 | 0 |
| SG20 | 1 | 1 | 0 | 1 | 1 | 1 | 1 | 1 | 1 | 1 |
| SG21 | 1 | 1 | 0 | 1 | 1 | 1 | 1 | 1 | 1 | 1 |
| SG22 | 0 | 0 | 0 | 0 | 1 | 0 | 0 | 0 | 1 | 1 |
| SG23 | 0 | 0 | 0 | 0 | 0 | 0 | 0 | 0 | 0 | 0 |
| SG24 | 0 | 0 | 0 | 0 | 0 | 0 | 0 | 0 | 0 | 0 |
| SG25 | 0 | 0 | 0 | 0 | 1 | 0 | 0 | 0 | 0 | 0 |
| SG26 | 0 | 0 | 0 | 0 | 0 | 0 | 0 | 0 | 0 | 0 |
| SG27 | 0 | 0 | 0 | 0 | 0 | 0 | 0 | 0 | 0 | 0 |
| SG28 | 0 | 0 | 0 | 1 | 1 | 1 | 1 | 1 | 1 | 0 |
| SG29 | 0 | 0 | 0 | 0 | 1 | 0 | 0 | 0 | 1 | 1 |
| SG30 | 1 | 0 | 0 | 0 | 1 | 0 | 0 | 0 | 1 | 1 |
| SG31 | 0 | 0 | 0 | 0 | 1 | 0 | 0 | 0 | 0 | 0 |
| SG32 | 1 | 1 | 1 | 1 | 1 | 1 | 1 | 1 | 1 | 1 |
| SG33 | 0 | 0 | 0 | 0 | 0 | 0 | 0 | 0 | 1 | 1 |
| SG34 | 1 | 1 | 1 | 1 | 1 | 1 | 1 | 1 | 1 | 1 |
| SG35 | 1 | 1 | 1 | 1 | 1 | 1 | 1 | 1 | 1 | 1 |
| SG36 | 1 | 1 | 1 | 1 | 1 | 1 | 1 | 1 | 1 | 1 |
| **Total** | 14 | 12 | 6 | 13 | 24 | 12 | 12 | 12 | 17 | 16 |

**Safeguard Key**

SG1: Data collected after the start of the study was not used to exclude participants or to select them into the analysis

SG2: Participants in all comparison groups met the same eligibility requirements and were from the same population and timeframe

SG3: Determination of eligibility and assignment to treatment group/exposure strategy were synchronized

SG4: None of the eligibility criteria were common effects of exposure and outcome

SG5: Any attrition (or exclusions after entry) <20% (based on numbers)

SG6: Missing data was less than 20%

SG7: Analysis accounted for missing data

SG8: Exposure variations / treatment deviations were less than 20%

SG9: Variations in exposure or withdrawals after start of the study were addressed by the analysis

SG10: Procedures for data collection of covariates were reliable and the same for all participants

SG11: The outcome was objective and/or reliably measured

SG12: Exposures/interventions were objectively and/or reliably measured

SG13: Outcome assessor(s) were blinded

SG14: Participants were blinded

SG15: Caregivers were blinded

SG16: Analyst(s) were blinded

SG17: Care was delivered equally to all participants

SG18: Cointerventions that could impact the outcome were comparable between groups or avoided

SG19: Control and active interventions/exposures were sufficiently distinct

SG20: Exposure/intervention definition was consistently applied to all participants

SG21: Outcome definition was consistently applied to all participants

SG22: The time period between exposure and outcome was similar across patients and between groups or the analyses adjusted for different lengths of follow-up of patients

SG23: Design and/or analysis strategies were in place that addressed potential confounding

SG24: Key confounders addressed through design or analysis were not common effects of exposure and outcome

SG25: Key baseline characteristics / prognostic indicators for the study were comparable across groups

SG26: Participants were randomly allocated to groups with an adequate randomization process

SG27: Allocation procedure was adequate and concealed

SG28: Conflict of interests were declared and absent

SG29: Analytic method was justified by study design

SG30: Computation errors or contradictions were absent

SG31: There was no discernible data dredging or selective reporting of the outcomes

SG32: All subjects were selected prior to intervention/exposure and evaluated prospectively

SG33: Carry-over or refractory effects were avoided or considered in the design of the study or were not relevant

SG34: The intervention/exposure period was long enough to have influenced the study outcome

SG35: Dose of intervention/exposure was sufficient to influence the outcome

SG36: Length of follow-up was not too long or too short in relation to the outcome assessment

**Supplemental File 3: Excluded Articles**

| **Excluded Article** | **Reasoning** |
| --- | --- |
| Kumar K, Nath R, Wyant GM. Treatment of chronic pain by epidural spinal cord stimulation: a 10-year experience. *Journal of Neurosurgery*. 1991;75(3):402-407. doi:10.3171/jns.1991.75.3.0402 | Wrong outcomes |
| Choi YA, Kim Y, Shin HI. Pilot study of feasibility and effect of anodal transcutaneous spinal direct current stimulation on chronic neuropathic pain after spinal cord injury. *Spinal Cord*. 2019;57(6):461-470. doi:10.1038/s41393-019-0244-x | Wrong intervention |
| Barolat G. Experience with 509 plate electrodes implanted epidurally from C1 to L1. *Stereotactic and Functional Neurosurgery*. 1993;61(2):60-79. doi:10.1159/000100624 | Wrong outcomes |
| Berwal D, Quintero A, Telkes I, et al. Improved selectivity in eliciting evoked electromyography responses with high-resolution spinal cord stimulation. *Neurosurgery*. 2024;95(2):322-329. doi:10.1227/neu.0000000000002878 | Wrong outcomes |
| Darrow DP, Balser DY, Freeman D, et al. Effect of epidural spinal cord stimulation after chronic spinal cord injury on volitional movement and cardiovascular function: study protocol for the phase II open label controlled E-STAND trial. *BMJ Open*. 2022;12(7):e059126. doi:10.1136/bmjopen-2021-059126 | Wrong study design |
| Pino IP, Hoover C, Venkatesh S, et al. Long-term spinal cord stimulation after chronic complete spinal cord injury enables volitional movement in the absence of stimulation. *Frontiers in Systems Neuroscience*. 2020;14:35. doi:10.3389/fnsys.2020.00035 | Wrong outcomes |
| Verdolin MH. Case report: restoration of neurologic function after trial high frequency SCS in spinal cord injury. *Neuromodulation*. 2017;20(7):e227. | Wrong study design |
| Kasch H, Love US, Jonsson AB, et al. Effect of pelvic laparoscopic implantation of neuroprosthesis in spinal cord injured subjects: a 1-year prospective randomized controlled study. *Spinal Cord*. 2022;60(3):251-255. doi:10.1038/s41393-021-00693-7 | Wrong intervention |
| Tanei T, Maesawa S, Nishimura Y, et al. Differential target multiplexed spinal cord stimulation using a paddle-type lead placed at the appropriate site for neuropathic pain after spinal cord injury in patients with past spinal surgical histories: study protocol for an exploratory clinical trial. *Trials*. 2023;24(1):395. doi:10.1186/s13063-023-07433-7 | Wrong study design |
| Pino IP, Nightingale TE, Hoover C, et al. The safety of epidural spinal cord stimulation to restore function after spinal cord injury: post-surgical complications and incidence of cardiovascular events. *Spinal Cord*. 2022;60(10):903-910. doi:10.1038/s41393-022-00822-w | Wrong outcomes |
| Whitworth LA, Feler CA. C1-C2 sublaminar insertion of paddle leads for the management of chronic painful conditions of the upper extremity. *Neuromodulation*. 2003;6(3):153-157. doi:10.1046/j.1525-1403.2003.03022.x | Wrong patient population |
| Kim M, Jeong D, Joo S, Seak D. Spinal cord stimulation for CRPS. *Stereotactic and Functional Neurosurgery*. 2022;100(Suppl 1):351. | Wrong patient population |
| Biktimirov A, Bryukhovetskiy I, Sharma A, Sharma HS. Spinal cord stimulation and intrathecal baclofen therapy for patients with severe spasticity after spinal cord injury. *Progress in Brain Research*. 2020;258:79-99. doi:10.1016/bs.pbr.2020.09.007 | Wrong outcomes |
| Sun XP, Shi JJ, Bao Y, et al. Safety and effectiveness of electromyography-induced rehabilitation treatment after epidural electrical stimulation for spinal cord injury: study protocol for a prospective, randomized, controlled trial. *Neural Regeneration Research*. 2023;18(4):819-824. doi:10.4103/1673-5374.353507 | Wrong study design |
| Dones I, Broggi G. The effects of spinal cord stimulation in neuropathic pain are sustained: A 24-month follow-up of the prospective randomized controlled multicenter trial of the effectiveness of spinal cord stimulation: Commentary. *Neurosurgery*. 2008;63(4):768-769. | Wrong patient population |
| Espiritu S, Tucker AA, Moon WK. Spinal cord stimulation following traumatic spinal cord hemisection: A successful trial. *Neuromodulation*. 2017;20(7):e246. | Wrong study design |
| Cross A, Hassan Z, Price C. Successful spinal cord stimulator trial for chronic neuropathic pain following traumatic spinal cord injury. *Neuromodulation*. 2020;23(3):e226. | Wrong study design |
| Fitzrol DN, Sitthinamsuwan B, Jirachaipitak S, Euasobhon P, Zinboonyong N, Nunta-Aree S. Comparative outcomes of spinal cord stimulation for neuropathic pain: peripheral nerve versus spinal cord lesions. *Neurosurgical Review*. 2026;49(1):117. doi:10.1007/s10143-025-03950-y | Wrong study design |
| Futch BG, Venkatraman V, Smith A, et al. Study protocol: single-blinded, controlled, clinical trial evaluating the feasibility of spinal cord stimulation for improving neuropathic pain and rehabilitation outcomes in patients with thoracic spinal cord injury. *Neurosurgery Practice*. 2025;6(2):e00135. | Wrong outcomes |

**Supplemental File 4: Funding Sources**

| **First Author (Year of publication)** | **Funding Source** |
| --- | --- |
| Rosales (2022) | None |
| Hamid (2007) | No funding disclosed |
| Espiritu (2017) | None |
| Reddy (2019) | None |
| Meglio (1989) | No funding disclosed |
| Lee (2024) | None |
| Tseng (2000) | No funding disclosed |
| Cross (2020) | None |
| Noordhof (2022) | None |
| Biktimirov (2023) | Grant "Neurotechnologies, virtual and augmented reality technologies", an agreement between the Fund for Support of Projects of the National Technological Initiative (NTI) and Far Eastern Federal University dated 05/08/2019 No. 2/1251/2019, identifier of the agreement on the provision of subsidies for state support of NTI Centers No.0000000007518P240002 |
